# Supplementary material
Source: Royal Society of Chemistry journal article supplement (doi:10.1039/d6ta01662f)
Supplement: d6ta01662f1.pdf [file d6ta01662f1.pdf]

# **Flexible Electromagnetic Functional Fibers with Synergistic Dual-Loss Mechanisms: Achieving Ultra-Broadband Absorption and Mechanical Robustness**

Yaoyao Li<sup>a</sup>, Wanli Zhou<sup>b</sup>, Shiyi Zhou<sup>a\*</sup>, Huan Zeng<sup>c</sup>, Daixi Gong<sup>a</sup>,  
Yanzhuo Tan<sup>c</sup>, Mengjin Jiang<sup>c\*</sup>

<sup>a</sup> *College of Materials and Chemistry & Chemical Engineering, Chengdu  
University of Technology, Chengdu 610059, P. R. China*

<sup>b</sup> *High-Tech Organic Fibers Key Laboratory of Sichuan Province,  
Chengdu, P. R. China*

<sup>c</sup> *College of Polymer Science & Engineering, Sichuan University, Chengdu  
610065, P. R. China*

*\*Corresponding author*

*E-mail address: [zhoushiyi06@cdut.edu.cn](mailto:zhoushiyi06@cdut.edu.cn), [memoggy@126.com](mailto:memoggy@126.com).*

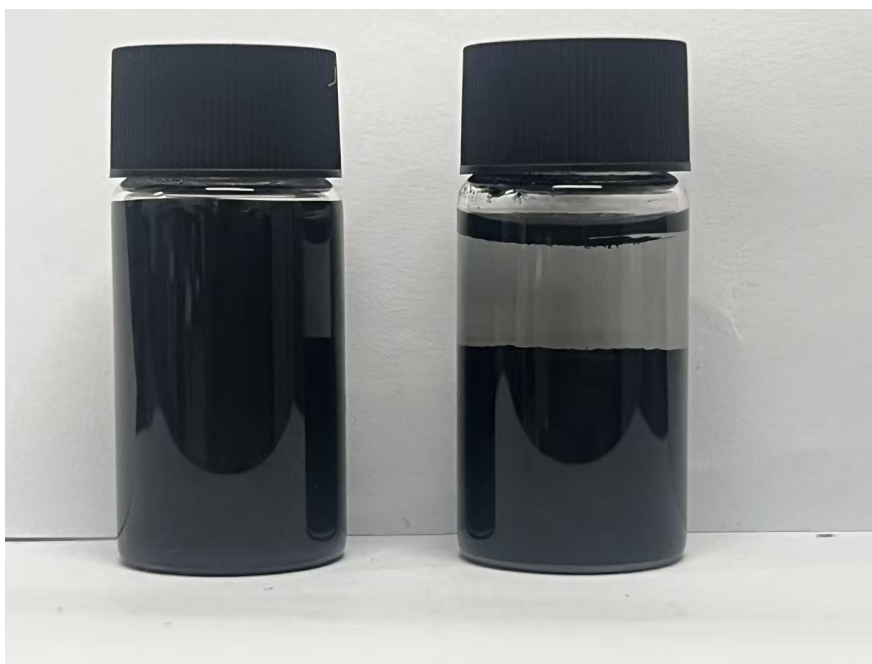

**Fig. S1.** Digital photograph of CB suspension that has been stored for 5 days.

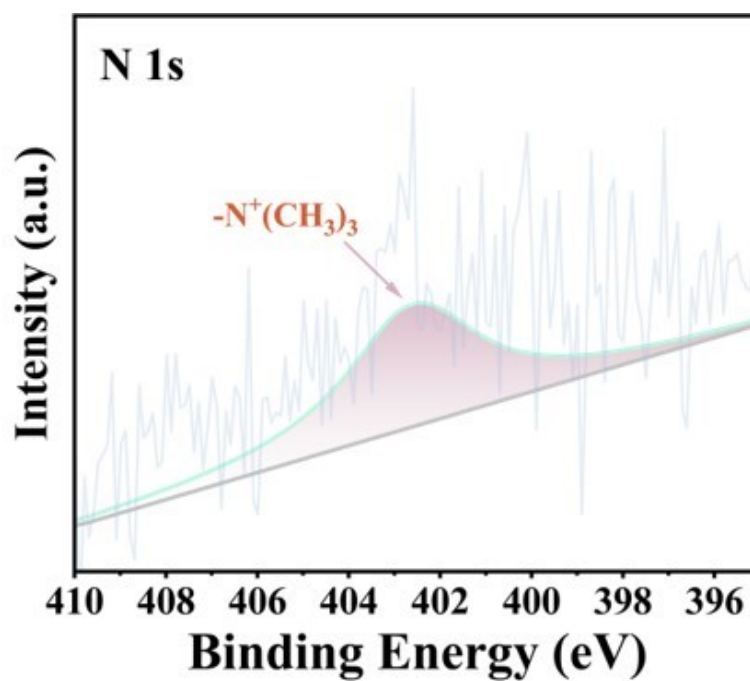

**Fig. S2.** High-resolution XPS spectra of CB@CTAB-OP-10: N 1s.

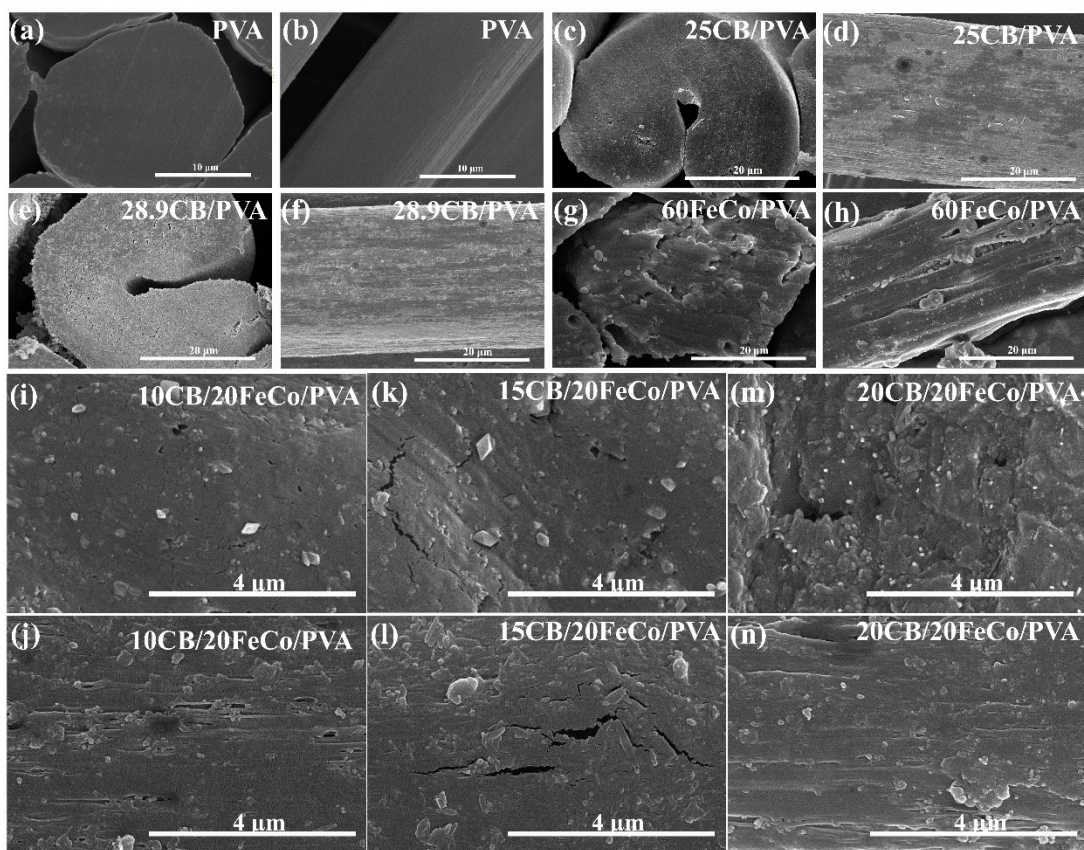

**Fig. S3.** SEM image of fibers, (a) and (b) PVA, (c) and (d) 25CB/PVA, (e) and (f) 28.9CB/PVA, (g) and (h) 60FeCo/PVA, (i) and (j) 10CB/20FeCo/PVA, (k) and (l) 15CB/20FeCo/PVA, (m) and (n) 20CB/20FeCo/PVA.

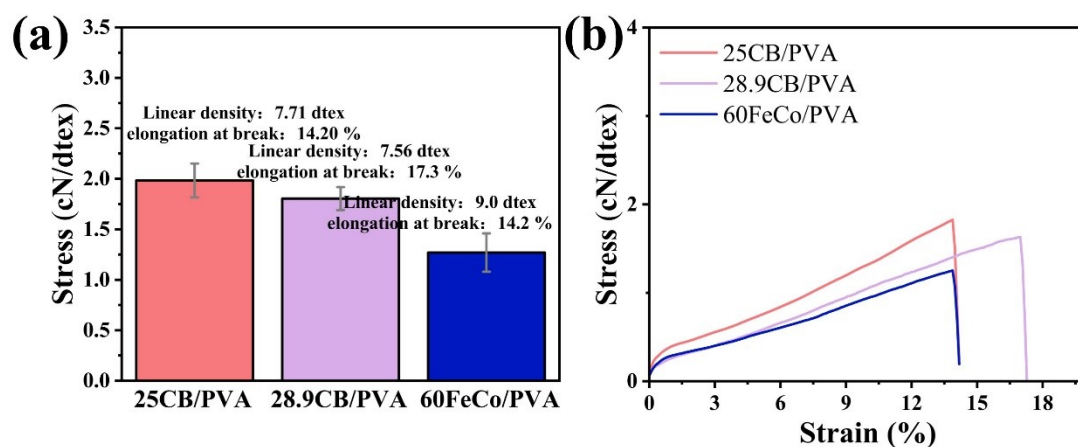

**Fig. S4.** (a) Tensile strength and (b) stress-strain curve of fibers.

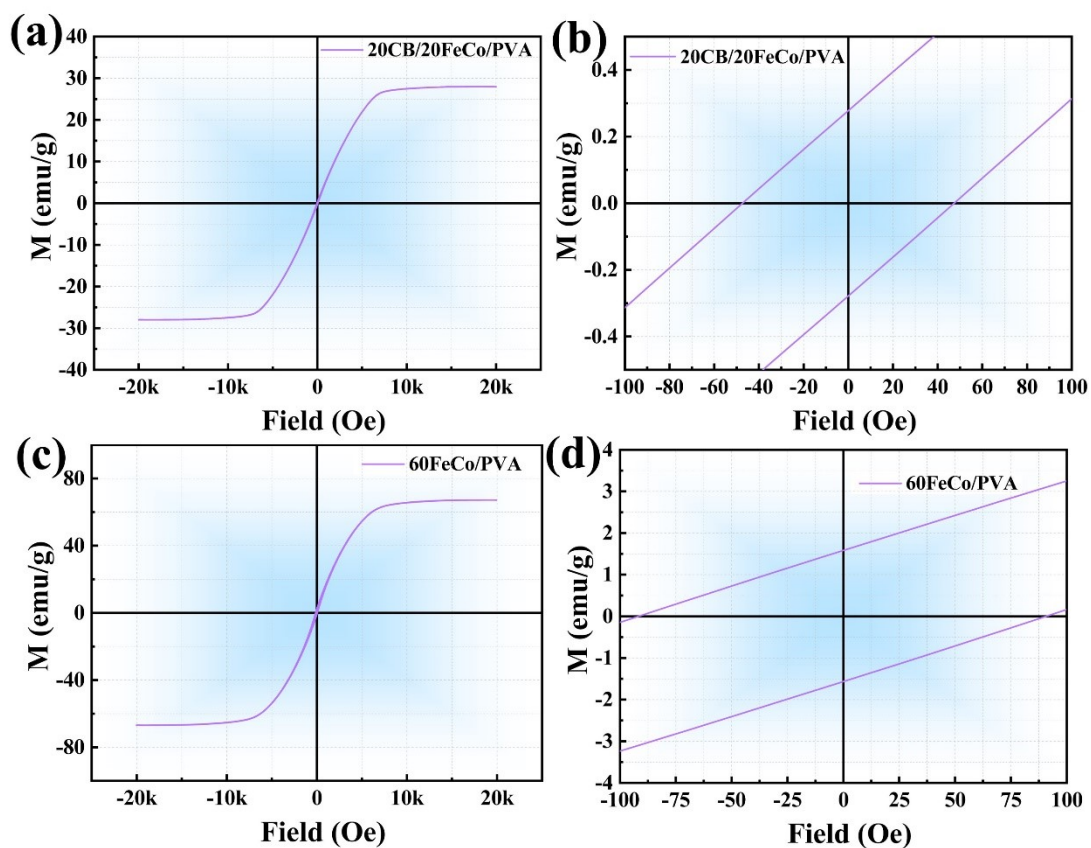

**Fig. S5.** Magnetic hysteresis loops: (a) 20CB/20FeCo/PVA, (c) 60FeCo/PVA, and the corresponding enlarged hysteresis loops: (b) 20CB/20FeCo/PVA, (d) 60FeCo/PVA.

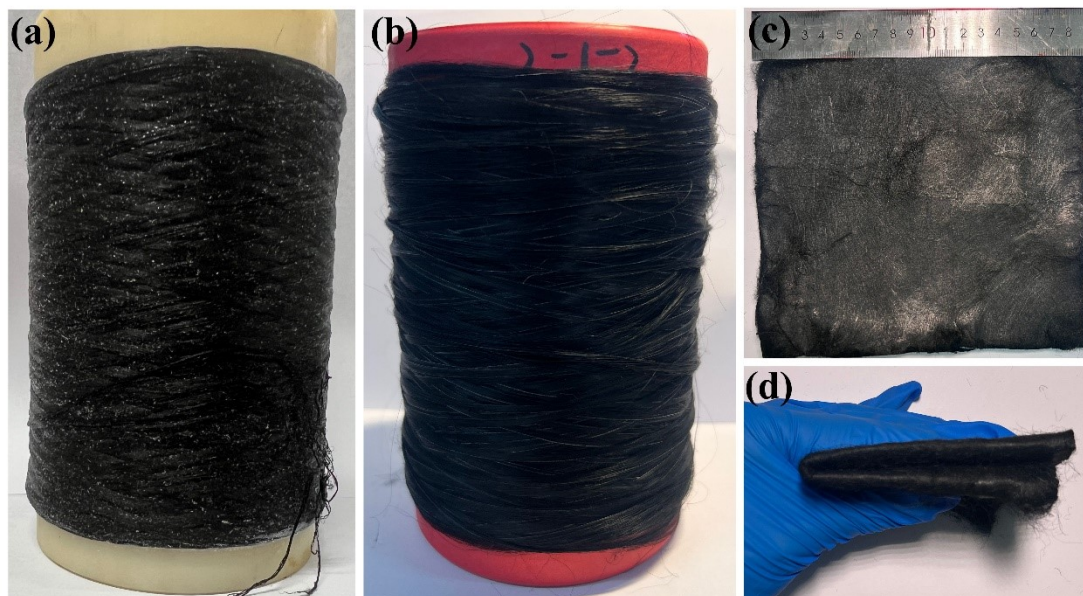

**Fig. S6.** 20CB/20FeCo/PVA fiber: (a) Digital photographs of as-spun fibers. (b) Fibers after hot stretching treatment. (c) Physical sample of 19 cm × 19 cm non-woven fabric. (d) Physical sample of non-woven fabric after multiple folds.

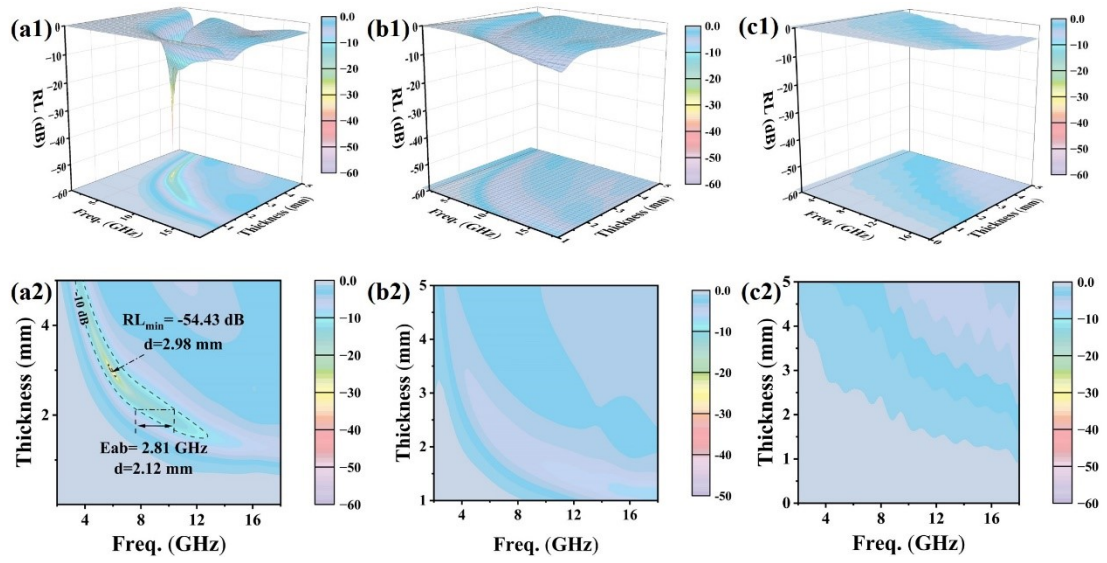

**Fig. S7.** Reflection loss ( $RL$ ) value of electromagnetic function: (a) 25CB/PVA, (b) 28.9CB/PVA, (c) 60FeCo/PVA.

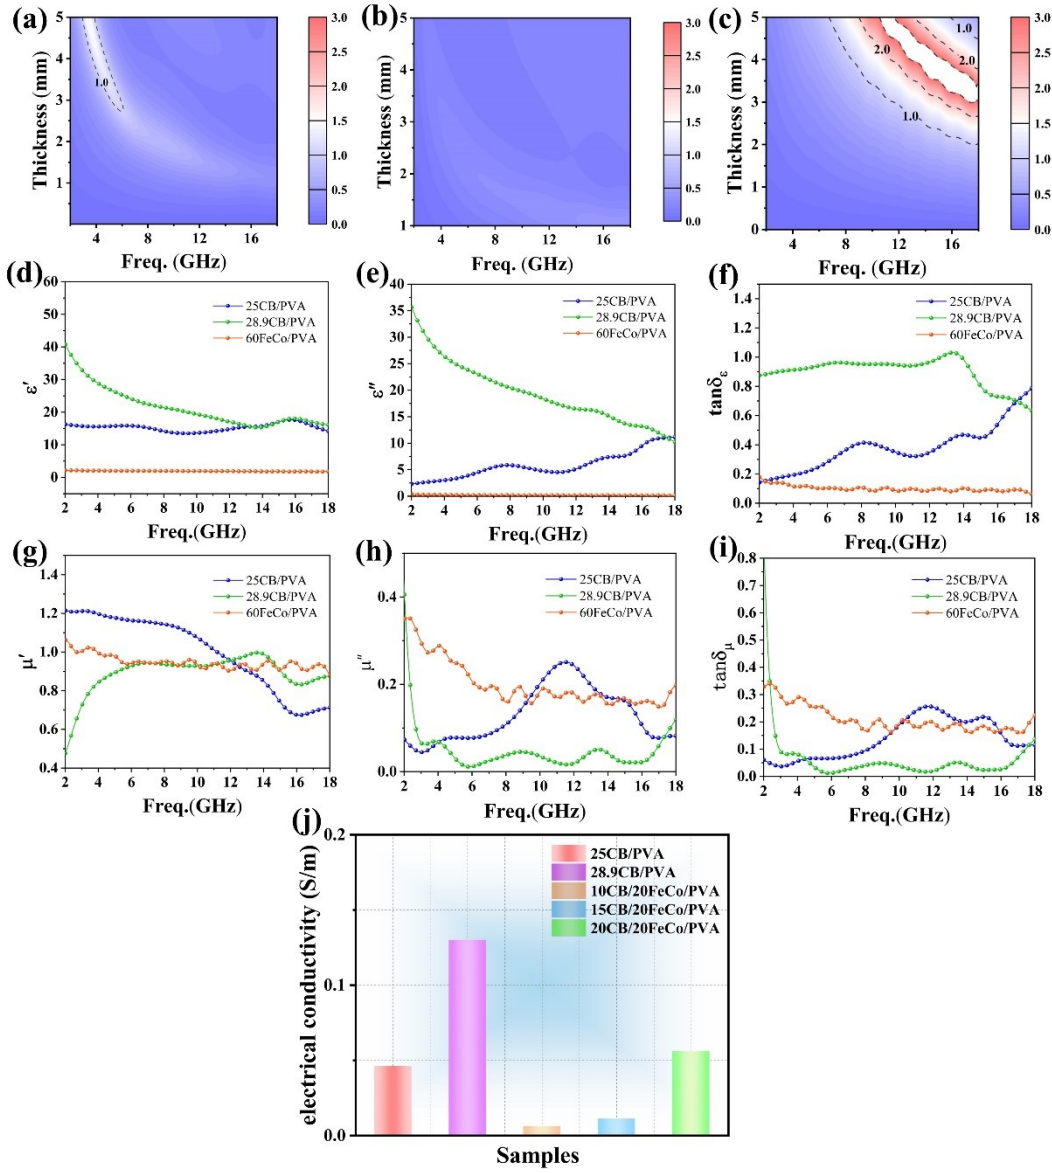

**Fig. S8.** A 2D color image of the  $|Z_{in}/Z_0|$  value for electromagnetic functional fibers: (a) 25CB/PVA, (b) 28.9CB/PVA, (c) 60FeCo/PVA. The real part (d) and imaginary part (e) of complex permittivity for fibers. The real part (g) and imaginary part (h) of permeability for fibers. (f)  $\tan\delta_\epsilon$  and (i)  $\tan\delta_\mu$  of fibers. (j) Electrical conductivity of composite fibers.

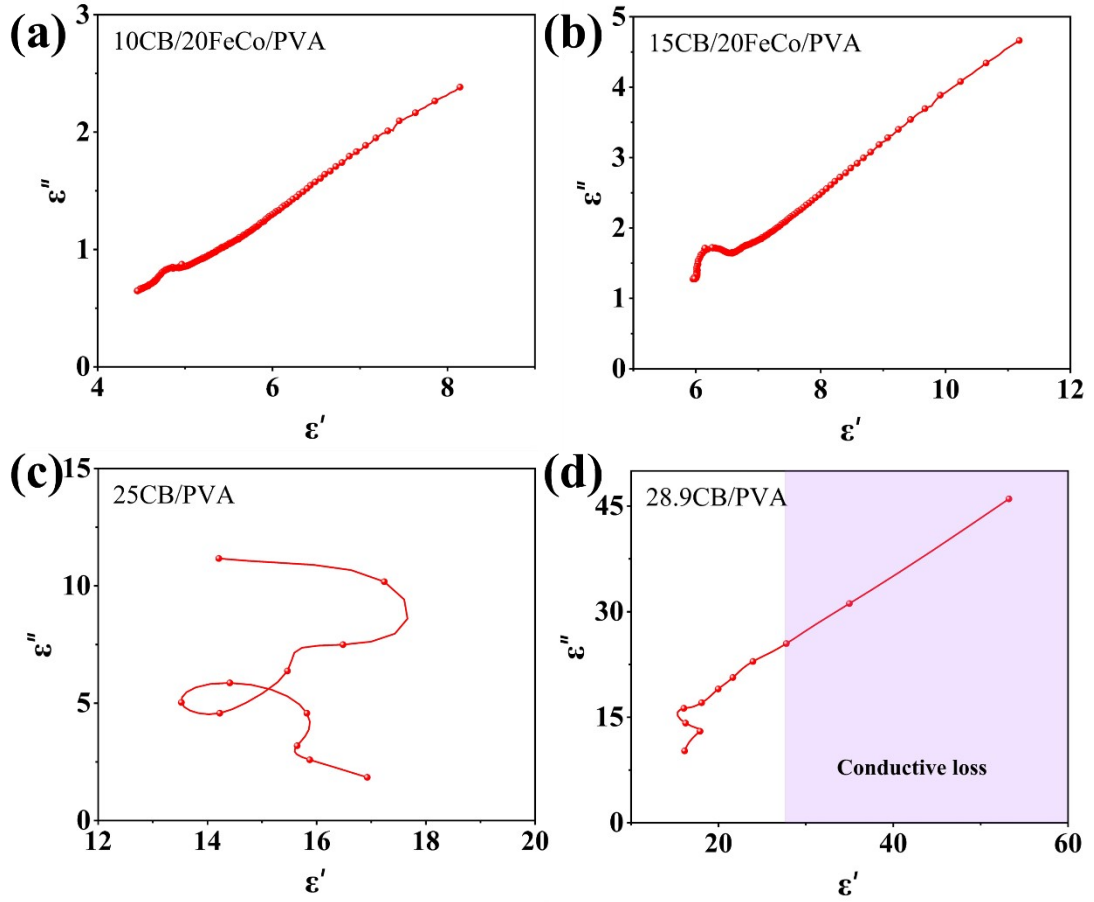

**Fig. S9.** The  $\epsilon'$  vs  $\epsilon''$  relationship curves for 10CB/20FeCo/PVA (a), 15CB/20FeCo/PVA (b), 25CB/PVA (c), and 28.9CB/PVA (d).

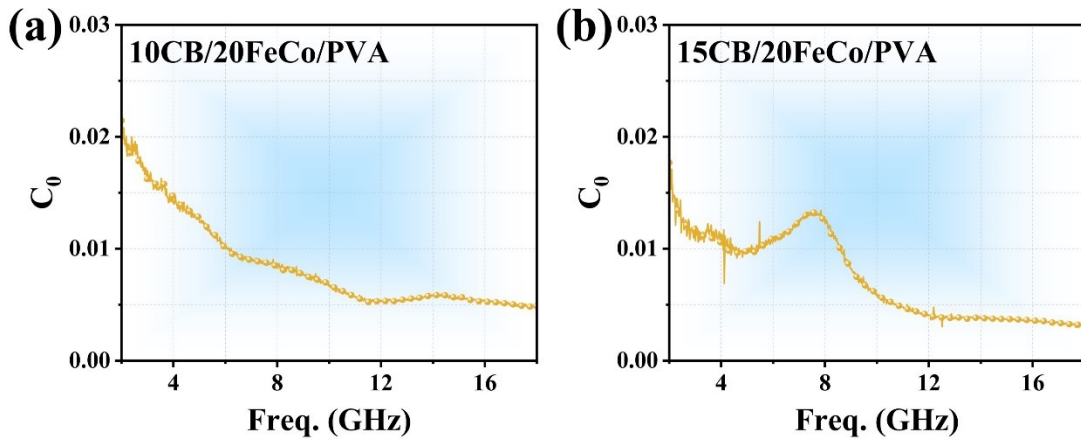

**Fig. S10.** The  $C_0 = \mu''(\mu')^{-2}f^{-1}$  of 10CB/20FeCo/PVA (a) and 15CB/20FeCo/PVA (b).

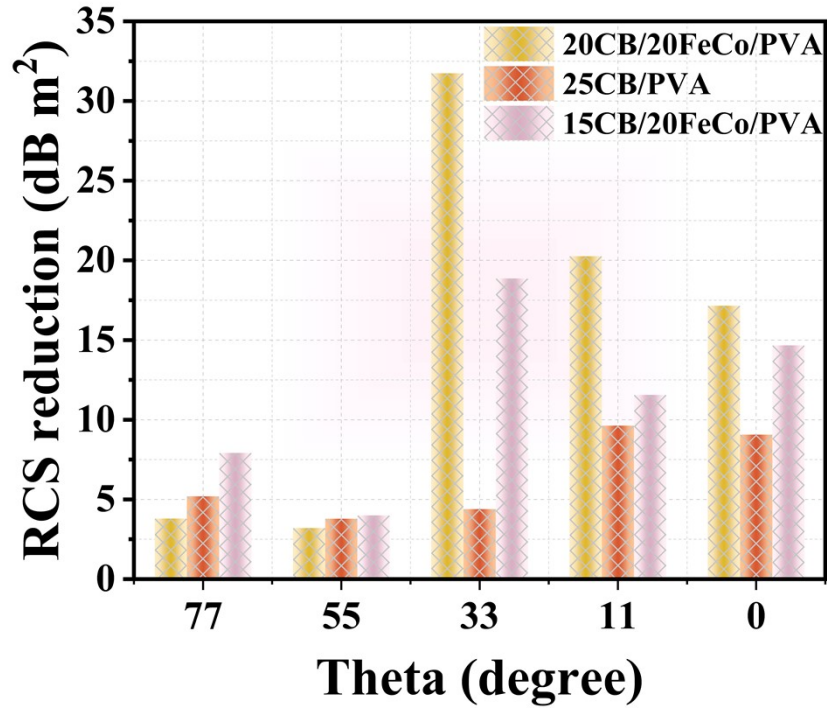

**Fig. S11.** RCS reduction effect of composite removal with PEC.

**Table S1.**

Comparison of electromagnetic wave absorption performance of 20CB/20FeCo/PVA with other materials.

| Sample                               | Thickness/<br>mm | RL <sub>min</sub> /<br>dB | Thickness/<br>mm | Bandwidth/<br>GHz | References       |
|--------------------------------------|------------------|---------------------------|------------------|-------------------|------------------|
| C@FeCoNi-60                          | 3.00             | -46.40                    | 3.00             | 3.35              | 1                |
| NiCo@g-C <sub>3</sub> N <sub>4</sub> | 2.00             | -35.63                    | 2.00             | 4.80              | 2                |
| VFT2h/MF/PPy                         | 3.35             | -39.20                    | 2.55             | 5.60              | 3                |
| SiCN-Fe0.5                           | 1.50             | -22.68                    | 1.50             | 4.50              | 4                |
| 40wt.%SiCnw                          | 1.30             | -35.20                    | 1.30             | 1.80              | 5                |
| HPPy                                 | 3.60             | -44.50                    | 3.60             | 5.40              | 6                |
| SiCN                                 | 2.00             | -31.10                    | 2.00             | 4.60              | 7                |
| 20CB/20FeCo/PVA                      | 2.55             | -44.36                    | 1.83             | 5.70              | <b>This work</b> |

## References

- [1] Y. Wu, Q. Sun, L. Yun and J. Ge, *Polym. Compos.*, 2025, **46**, 15782-15794.
- [2] S. Hu, Y. Zhou, M. He, Q. Liao, H. Yang, H. Li, R. Xu and Q. Ding, *Mater. Lett.*, 2018, **231**, 171-174.
- [3] H. Han, Z. Lou, Q. Wang, L. Xu and Y. Li, *Adv. Fiber Mater.*, 2024, **6**, 739-757.
- [4] X. Guo, F. Xiao, J. Li, H. Zhang, Q. Hu, G. Li and H. Sun, *Ceram. Int.*, 2021, **47**, 1184-1190.
- [5] J. Kuang, T. Xiao, X. Hou, Q. Zheng, Q. Wang, P. Jiang and W. Cao, *Ceram. Int.*, 2019, **45**, 11660-11667.
- [6] H. Ren, T. Li, H. Wang, Z. Guo, T. Chen and F. Meng, *Chem. Eng. J.*, 2022, **427**, 131582.
- [7] F. Xiao, H. Sun, J. Li, X. Guo, H. Zhang, J. Lu, Z. Pan and J. Xu, *Ceram. Int.*, 2020, **46**, 12773-12781.
